# Supplementary material
Source: PubMed Central journal article supplement (PMC3133258)
Supplement: JB.00044-11_1.pdf [file JB.00044-11_1.pdf]

## SUPPORTING INFORMATION

The anaerobe-specific ORP complex of *Desulfovibrio vulgaris* Hildenborough is encoded by two divergent operons co-regulated by  $\sigma^{54}$  and a cognate transcriptional regulator.

Anouchka Fiévet<sup>1</sup>, Laetitia My<sup>1</sup>, Eric Cascales<sup>2</sup>, Mireille Ansaldi<sup>3</sup>, Sofia Pauleta<sup>4</sup>, Isabel Moura<sup>4</sup>, Zorah Dermoun<sup>1</sup>, Christophe Bernard<sup>2</sup>, Alain Dolla<sup>1</sup> and Corinne Aubert<sup>1\*</sup>

<sup>1</sup> Laboratoire Interactions et Modulateurs de Réponses, Institut de Microbiologie de la Méditerranée, CNRS 13402 Marseille cedex 20, France,

<sup>2</sup> Laboratoire d'Ingénierie des Systèmes Macromoléculaires, Institut de Microbiologie de la Méditerranée, CNRS 13402 Marseille cedex 20, France,

France,

<sup>3</sup> Laboratoire de Chimie Bactérienne, Institut de Microbiologie de la Méditerranée, CNRS 13402 Marseille cedex 20, France,

<sup>4</sup> REQUIMITE, Departamento de Química, Centro de Química Fina e Biotecnologia, Faculdade de Ciências e Tecnologia, Universidade Nova de Lisboa, Caparica 2829-516, Portugal.

\* To whom correspondence should be sent : Tel: +334164687. Fax: +33 491164540. E-mail: [aubert@ifr88.cnrs-mrs.fr](mailto:aubert@ifr88.cnrs-mrs.fr)

**Table S1.** Bacterial strains and plasmids used in this study.

| Strains or plasmid                          | Characteristics                                                                                                                                                                     | Reference or source         |
|---------------------------------------------|-------------------------------------------------------------------------------------------------------------------------------------------------------------------------------------|-----------------------------|
| <i>E. coli</i>                              |                                                                                                                                                                                     |                             |
| TG1                                         | K12, $\Delta(lac-pro)$ , <i>supE</i> , <i>thi</i> , <i>hsdD5</i> (F', <i>traD36</i> , <i>proA</i> <sup>+</sup> <i>B</i> <sup>+</sup> , <i>lacI</i> <sup>ρ</sup> , <i>lacZAM15</i> ) | Sambrook and Russell (2001) |
| MW3064                                      | Donor strain for conjugation; <i>thrB1004 pro thi rpsL hsdS lacZ_M15</i>                                                                                                            | Dehio et al (1997)          |
| W3110 – <i>lacZ</i>                         | <i>RP4-1360_(araBAD)567 _dapA1341::_erm pir(wt)_</i>                                                                                                                                | This Study                  |
| W3110 – <i>lacZ rpoN</i>                    | <i>rrnD-rrnE, rph-1, <math>\Delta lacZ</math></i><br><i>rrnD-rrnE, rph-1, <math>\Delta lacZ, \Delta rpoN</math></i>                                                                 | This Study                  |
| <i>Desulfovibrio vulgaris</i> Hildenborough | Wild-type strain                                                                                                                                                                    | Postgate (1984)             |
| DVH (2103-strep)                            | Contains the <i>DVU2103</i> gene fused to a C-terminal Strep-TagII tag in DVH                                                                                                       | This Study                  |

|                               |                                                                                                                                                                  |                            |
|-------------------------------|------------------------------------------------------------------------------------------------------------------------------------------------------------------|----------------------------|
| DVH (2108-strep)              | (DVH::p2103-strep)<br>Contains the <i>DVU2108</i> gene fused to a C-terminal Strep-TagII tag in DVH (DVH::p2108-strep)                                           | This Study                 |
| DVH (2109-strep)              | Contains the <i>DVU2109</i> gene fused to a C-terminal Strep-TagII tag in DVH (DVH::p2109-strep)                                                                 | This Study                 |
| DVH ( $\Delta$ p2106)         | DVH $\Delta$ promoter <i>DVU2106</i> ::p2106PAS                                                                                                                  | This Study                 |
| DVH (p2105:: <i>uidA</i> )    | Contains the promoter region of <i>DVU2105</i> fused to the <i>uidA</i> gene                                                                                     | This Study                 |
| DVH (p2107:: <i>uidA</i> )    | Contains the promoter region of <i>DVU2107</i> fused to the <i>uidA</i> gene                                                                                     | This Study                 |
| <i>Methanosarcina barkeri</i> | Wild-type strain                                                                                                                                                 | DSMZ 804                   |
| <b>Plasmids</b>               |                                                                                                                                                                  |                            |
| pNotI9                        | Cloning vector pUC19. NdeI site replaced by a NotI site                                                                                                          |                            |
| pNotI9Cm-Mob-XS               | Contains the 1.4-kb <i>cm</i> gene and the oriT of plasmid RP4 on a 1.6-kb fragment in the pNotI9                                                                | Dolla et al (2000)         |
| p2103-strep                   | Contains the <i>DVU2103</i> gene fused to a C-terminal Strep-TagII tag on an <i>SpeI-XhoI</i> 900pb fragment in the pNotI9Cm-Mob-XS vector                       | This Study                 |
| p2108-strep                   | Contains the <i>DVU2107</i> and <i>DVU2108</i> genes fused to a C-terminal Strep-TagII tag on an <i>SpeI-XhoI</i> 1230 pb fragment in the pNotI9Cm-Mob-XS vector | This Study                 |
| p2109-strep                   | Contains the <i>DVU2109</i> gene fused to a C-terminal Strep-TagII tag on an <i>SpeI-XhoI</i> 1500pb fragment in the pNotI9Cm-Mob-XS vector                      | This Study                 |
| pOK12                         | Cloning vector, P15A replicon, Kan <sup>R</sup>                                                                                                                  |                            |
| pOK2106                       | Contains the <i>DVU2106</i> gene fused to an N-terminal FLAG tag in the pOK12 vector                                                                             | This Study                 |
| pT7.5                         | Cloning vector, ColeI replicon, Amp <sup>R</sup>                                                                                                                 | Viera and Messing, 1992    |
| pT7-5-2105-LacZ               | Contains the promoter region of <i>DVU2105</i> fused to the <i>lacZ</i> gene                                                                                     | This study                 |
| pT7-5-2106-LacZ               | Contains the promoter region of <i>DVU2106</i> fused to the <i>lacZ</i> gene                                                                                     | Tabor and Richardson, 1985 |
| pT7-5-2107-LacZ               | Contains the promoter region of <i>DVU2107</i> fused to the <i>lacZ</i> gene                                                                                     | This Study                 |
| pET19b                        | Expression vector, gene expression under the control of the T7 promoter                                                                                          | This Study                 |
| pET2106CLIV                   | Contains a truncated 960 pb <i>DVU2106</i> gene encoding residues 127 to 458                                                                                     | This study                 |

|            |                                                                                                                                                                                  |                       |
|------------|----------------------------------------------------------------------------------------------------------------------------------------------------------------------------------|-----------------------|
| p2106PAS   | fused to a N-terminal 10-His tag in the pET19b vector<br>Contains a truncated <i>DVU2106</i> gene (400pb from ATG) on an <i>SpeI-XhoI</i> fragment in the pNot19Cm-Mob-XS vector | Novagen<br>This Study |
| p2105-uidA | Contains the promoter region of <i>DVU2105</i> fused to the uidA gene in pNot19Cm-Mob-XS                                                                                         | This Study            |
| p2107-uidA | Contains the promoter region of <i>DVU2107</i> fused to the uidA gene in pNot19Cm-Mob-XS                                                                                         | This Study            |

This Study

Postgate, J.R. (1984) in *The Sulphate-reducing bacteria*, 2<sup>nd</sup> ed; pp12-13, Cambridge University Press, Cambridge, UK.

Dolla, A., Pohorelic, B.K., Voordouw, J.K., and Voordouw, G. (2000) Deletion of the *hmc* operon of *Desulfovibrio vulgaris* subsp. *vulgaris* Hildenborough hampers hydrogen metabolism and low-redox-potential niche establishment. *Arch. Microbiol* **174**: 143-151.

Vieira, J., and Messing, J. (1991) New pUC-derived cloning vectors with different selectable markers and DNA replication origins. *Gene*. **100**: 189-94.

Tabor, S., and Richardson, C.C. (1985) A bacteriophage T7 RNA polymerase/promoter system for controlled exclusive expression of specific genes. *Proc Natl Acad Sci U S A*. **82**: 1074-8.

**Table S2.** Primers used in this study.

| <b>Primer</b>                                         | <b>Sequence</b>                                                              |
|-------------------------------------------------------|------------------------------------------------------------------------------|
| <b>To construct plasmids for pulldown experiments</b> |                                                                              |
| pUC19SpeI-XhoI                                        | 5'-ACCTCAGTACACTAGTCCGGGGATCCTCTAGAGTCCG-3'                                  |
| pUC19XhoI_rev                                         | 5'-GTACTCGAGGTACCGAGCTCGAATTCACTGG-3'                                        |
| Nter2103SpeI                                          | 5'-TAAATCACTAGTATGAAACAGTTCGTCGTCATC-3'                                      |
| 2103strep_comp                                        | 5'-TAAATCACTAGTTATTTTCGAACTGCCGGTGGCTC<br>CAAGCGTGACGAGTGCCAGCAACTGG-3'      |
| DVU2107strep                                          | 5'-CAGAATTCGGCAGGCGGATGGCGACCTGCC-3'                                         |
| DVU2108strep_comp                                     | 5'-GTGGATCCTTATTTTCGAACTGCCGGGTG<br>GCTCCAAGCGCTCCAGTGCTCCTTCA-3'            |
| Nter2109SpeI                                          | 5'-TAAATCACTAGTATGAGTACCGTGAACGGCGG-3'                                       |
| 2109strep_comp                                        | 5'-TAAATCCTCGAGTTATTTTCGAACTGCCG<br>GGTGGCTCCAAGCGCTATGGTCGCAGGTGTGGCACCC-3' |
| CM1                                                   | 5'-GACATGGAAGCCATCACAGA-3'                                                   |
| CM2                                                   | 5'-ACTCCGTAGCGCTGATGT-3'                                                     |
| Mob_up                                                | 5'-GCCGGCGCGCCGCCATTTC-3'                                                    |
| Mob_down                                              | 5'-GCAGGTCGACTCTAGAGG-3'                                                     |
| <b>For operon organisation</b>                        |                                                                              |
| DVU2103_dir                                           | 5'-GAAGCGCGTGTCCGGAGAC-3'                                                    |
| DVU2104_rev                                           | 5'-AGGCTGCTTCGCGTAATG-3'                                                     |
| DVU2104_dir                                           | 5'-CGTTGGGCTCCTCGACAT-3'                                                     |
| DVU2105_rev                                           | 5'-CTCGATGTCGTGATGTC-3'                                                      |
| DVU2105_dir                                           | 5'-CAGGGCATTCTTCATAGGTC-3'                                                   |
| DVU2106_rev                                           | 5'-CGAGGTCGACCGTGAACA-3'                                                     |
| F1rC                                                  | 5'-GCCCGGAGACGACGGAC-3'                                                      |
| DVU2107_right                                         | 5'-ACAGGATGAAGGCATATTCGAT-3'                                                 |
| DVU2107                                               | 5'-GGCGGCACTTGGAAAGGG-3'                                                     |
| SaeI2108_comp                                         | 5'-GCCAGCTCTCACCAAGTGTCTTCCACGG-3'                                           |

|                                                          |                                                                           |
|----------------------------------------------------------|---------------------------------------------------------------------------|
| Ndel2108                                                 | 5'-CGCATATGCGAATAGTCAATCACC-3'                                            |
| Mrp_comp                                                 | 5'-GCCCCAGCGCACTTCGG-3'                                                   |
| DVU2109                                                  | 5'-TGACGTACTTGCCAGCA-3'                                                   |
| DVU2110_comp                                             | 5'-CCTCGACACATACGGTC-3'                                                   |
| <b>For real-time PCR analysis</b>                        |                                                                           |
| DVU2104_left_b                                           | 5'-GTGGACTGTGATGTCGAGGAG-3'                                               |
| DVU2104_right_b                                          | 5'-AGACGAGTTCACAGAGTCCACA-3'                                              |
| DVU2106_left                                             | 5'-CGACCTCTACTATCGGCTGAAT-3'                                              |
| DVU2106_right                                            | 5'-ACAGGATGAAGGCATATTCGAT-3'                                              |
| DVU2108_up                                               | 5'-ATTCAAGGCTGCCCAGATGG-3'                                                |
| DVU2108_down+                                            | 5'-GTGTCGGCAGGGCGGAGT-3'                                                  |
| Nter_DVU2106                                             | 5'-TTGAATTCAATGGCCCTGCCCCGAGACAT-3'                                       |
| DVU2106_rev                                              | 5'-CGAGGTCGACCCGTGAACA-3'                                                 |
| <b>For identification of the transcripts start sites</b> |                                                                           |
| DVU2107_fwd                                              | 5'-TCCAAGACCGTTATCCCCCTGCCC-3'                                            |
| DVU2107_rev                                              | 5'-CAGTGTGGGAGTCTGCCCTC-3'                                                |
| DVU2105_fwd                                              | 5'-TCCGTGTGAAAGTCTCTATC-3'                                                |
| DVU2105_rev(+1)                                          | 5'-CAGGGCATTCTTCATAGGTC-3'                                                |
| <b>For transcriptional fusions</b>                       |                                                                           |
| Prom2105                                                 | 5'-CTCACTATAGGGAGACCCGGAATTCGAG<br>CTCCTATGATCCCGTGTGAAAGTCTCTATCATGTG-3' |
| Prom2105_comp                                            | 5'-GGTCGACTCTAGAGGATCCCCGGCCATATGTGC<br>TCCTTCCGCCGGTATGC-3'              |
| Prom2106                                                 | 5'-CTCACTATAGGGAGACCCGGAATTCGAGCTCCAT<br>ATGTGCTCCTTCCGCCGGTATGC-3'       |
| Prom2106_comp                                            | 5'-GGTCGACTCTAGAGGATCCCCGGCCATATGATCCCTC<br>CGTGTGAAAGTCTCTATCATGTG-3'    |

|                                                                            |                                                                                        |
|----------------------------------------------------------------------------|----------------------------------------------------------------------------------------|
| Prom2107                                                                   | 5'-CTCACTATAGGGAGACCGGAATTCGAGC<br>TCCGTAGCCGGTCGACGCCAATCCCG-3'                       |
| Prom2107_comp                                                              | 5'-GGTCGACTCTAGAGGATCCCCGGGCCAT<br>GGCGTGGCGTACCTCCGGTACC-3'                           |
| pOK2106                                                                    | 5'-CGAGATCTATCGATGCATGCCATGGACTACAAAGACG<br>ACGATGACAAAGGGGCCCTGCCCCGAGACATCCCCTGCG-3' |
| pOK_comp                                                                   | 5'GAAAGCTTCGAAATTCGAGCTCCCGGTATCATTTCCGTGT<br>CGCCACGTTGCAGGATG-3'                     |
| <b>For overexpression of<br/>DVU2106 in <i>E.coli</i></b><br>pET 2106_cliv | 5'-GCCGGCCATATCGACGACGACGACAAAGACGGCCCTTC<br>TCGACCTCCTTCCGC-3'                        |
| pET 2106_comp                                                              | 5'-GTTAGCAGCCGGATCCTCGAGCATATGTTCAT<br>TTTCGTGTCGCCACGTTGCAGGATG-3'                    |
| <b>For gel mobility shift assay</b>                                        |                                                                                        |
| Prom2105                                                                   | 5'-CTCACTATAGGGAGACCGGAATTCGAG<br>CTCCTATGATCCGTGTGAAAGTCTCTATCATGTG-3'                |
| Prom2105_comp                                                              | 5'-GGTCGACTCTAGAGGATCCCCGGCCATATGTGC<br>TCCTTCCGCCGATGC-3'                             |
| Prom2106                                                                   | 5'-CTCACTATAGGGAGACCGGAATTCGAGCTCCAT<br>ATGTGCTCCTTCCGCCGATGC-3'                       |
| Prom2106_comp                                                              | 5'-GGTCGACTCTAGAGGATCCCCGGCCATATGATCCTC<br>CGTGTGAAAGTCTCTATCATGTG-3'                  |
| Prom2107                                                                   | 5'-CTCACTATAGGGAGACCGGAATTCGAGC<br>TCCGTAGCCGGTCGACGCCAATCCCG-3'                       |
| Prom2107_comp                                                              | 5'-GGTCGACTCTAGAGGATCCCCGGGCCAT<br>GGCGTGGCGTACCTCCGGTACC-3'                           |
| Prom2105_comp                                                              | 5'-CATCTTTTCCCAACACAC-3'                                                               |
| Prom2106_comp                                                              | 5'-GTGTGTTGGGAAAAGATG-3'                                                               |

|                                                                |                                         |
|----------------------------------------------------------------|-----------------------------------------|
| 2106-A-comp_dir                                                | 5'-CATGTGGGGCATTTTGGGCCCTATTT-3'        |
| 2106-A-comp_rev                                                | 5'-AAATAGGGCGCAAATGCGCCACATG-3'         |
| 2106-B-comp_dir                                                | 5'-GACATAGGGCGTGTTTGGGCCACATG-3'        |
| 2106-B-comp_rev                                                | 5'-CATGTGGGGCAAACACGCCCTATGTC-3'        |
| <b>To construct p2106PAS<br/>for <i>DVU2106</i> disruption</b> |                                         |
| 2106PAS                                                        | 5'-AGTAGCTCGAGATGGCCCTGCCCCGAGACATCC-3' |
| 2106PAS_comp                                                   | 5'-CCGATACTAGTTCACGGTGCGTGGGGC-3'       |

**Table S3.** Identified interaction partners from the ORP gene cluster of tagged proteins. MALDI-MS scores were obtained using the MASCOT search engine and ESI-IT scores were obtained using SEQUEST.

| <b>Bait</b>       | <b>Locus interactors</b> | <b>M<sub>r</sub> (kDa)</b> | <b>Method of identification</b> | <b>Score</b> | <b>Peptide (hits)</b> | <b>% Coverage</b> |
|-------------------|--------------------------|----------------------------|---------------------------------|--------------|-----------------------|-------------------|
| <b>2103-strep</b> | DVU2108                  | 12.5                       | ESI-IT                          | 40.22        | 15                    |                   |
|                   | DVU2104                  | 32                         | MALDI-MS                        | 79           | 12                    | 39                |
|                   | DVU2109                  | 51                         | MALDI-MS                        | 86           | 9                     | 31                |
| <b>2108-strep</b> | DVU2103                  | 31                         | MALDI-MS                        | 176          | 18                    | 81.2              |
|                   | DVU2104                  | 32                         | MALDI-MS                        | 89           | 11                    | 35.5              |
| <b>2109-strep</b> | DVU2108                  | 12.5                       | ESI-IT                          | 30.2         | 7                     |                   |
|                   | DVU2105                  | 17                         | MALDI-MS                        | 62           | 7                     | 51                |
|                   | DVU2103                  | 31                         | MALDI-MS                        | 109          | 14                    | 71                |
|                   | DVU2104                  | 32                         | MALDI-MS                        | 116          | 11                    | 37                |



**Table S4** Recurrent copurified proteins defined as “contaminants”

| <b>ORF number</b>                                                            | <b>Name</b>             |
|------------------------------------------------------------------------------|-------------------------|
| DVU0811                                                                      | Dna K                   |
| DVU0847                                                                      | Adenylsulfate reductase |
| DVU0881                                                                      | Elongation factor G     |
| DVU1834                                                                      | Pyruvate carboxylase    |
| DVU1976                                                                      | GroEL                   |
| DVU2920                                                                      | Elongation factor TU    |
| DVU0958, DVU1303, DVU1306,<br>DVU1309, DVU1320, DVU1328,<br>DVU2518, DVU3150 | Ribosomal proteins      |

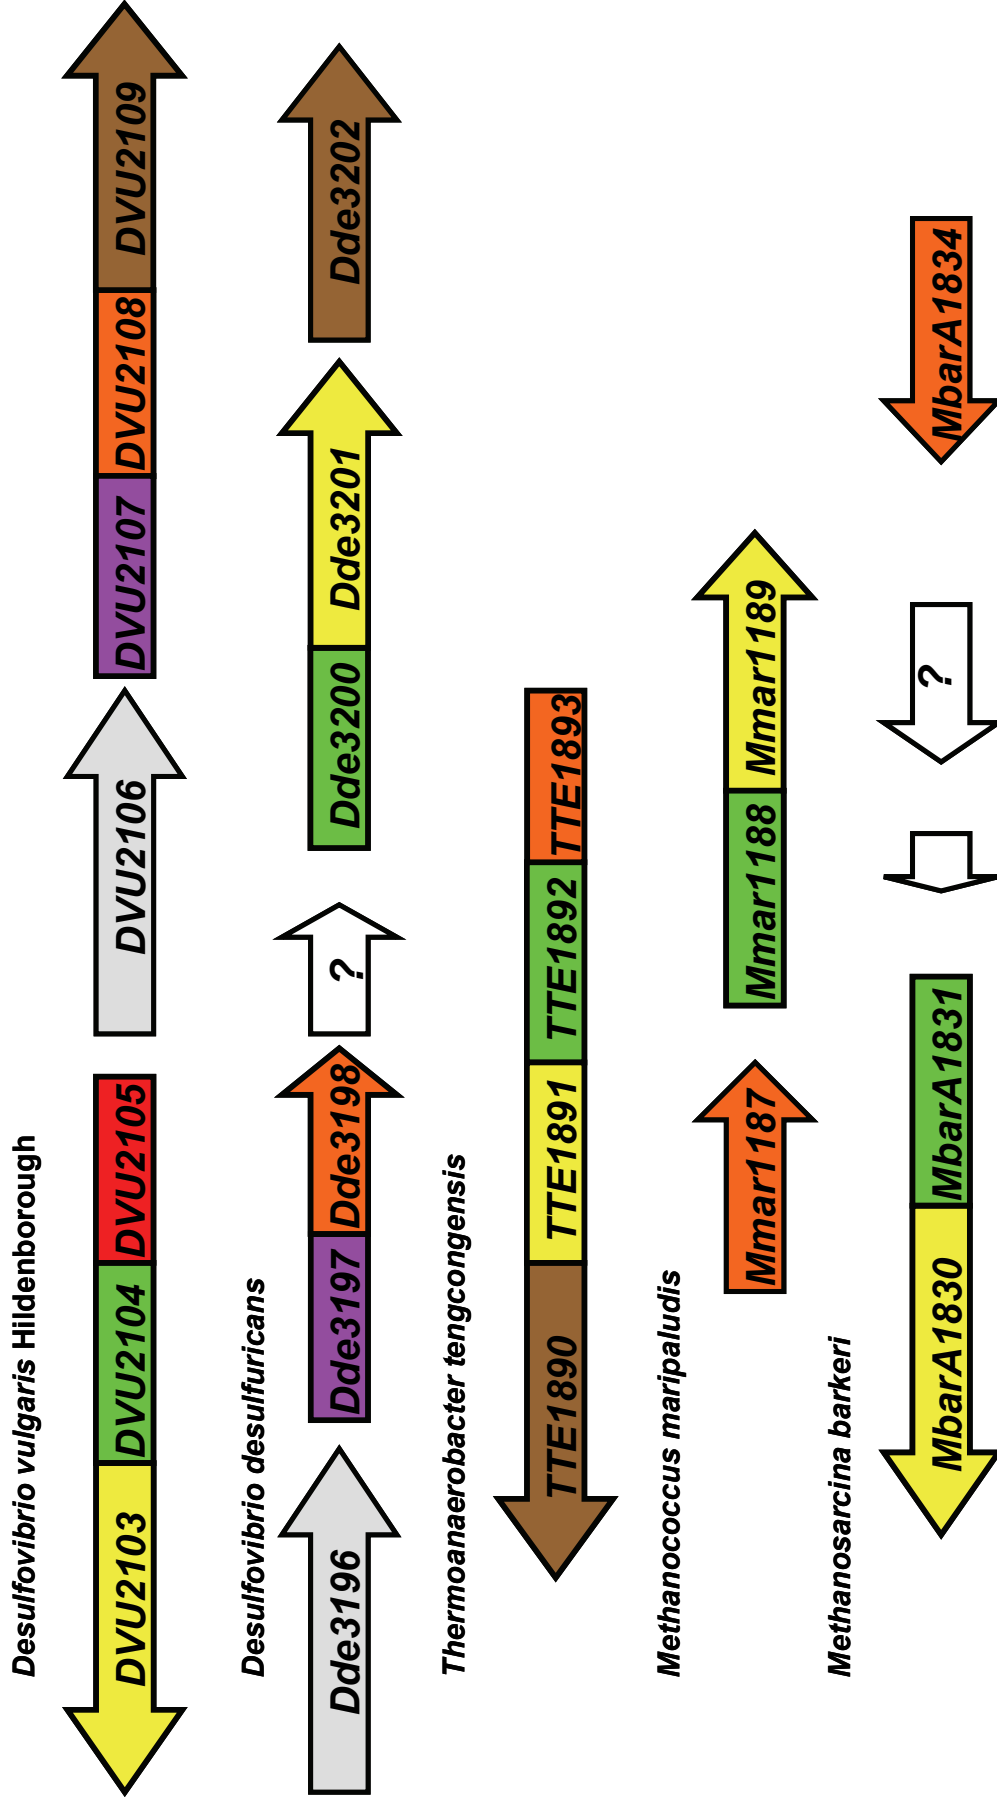

**Figure S1.** *orp* gene cluster organization in various microbial species using STRING (von Mering et al., 2005) and phylogenetic analysis of DVU2103, DVU2104 and DVU2108 genes and their homologues published by Scholten (Scholten et al., 2007). Homologues of DVU2103 (yellow), DVU2104 (green), DVU2105 (red), DVU2106 (grey), DVU2107 (purple), DVU2108 (orange) and DVU2109 (brown) are indicated. Genes are not drawn to scale. The direct boarding of ORFs indicates overlapping of start and stop codons, while space between ORFs indicates intergenic region larger than 1 base pair.

**Fievet et al., Figure S1**

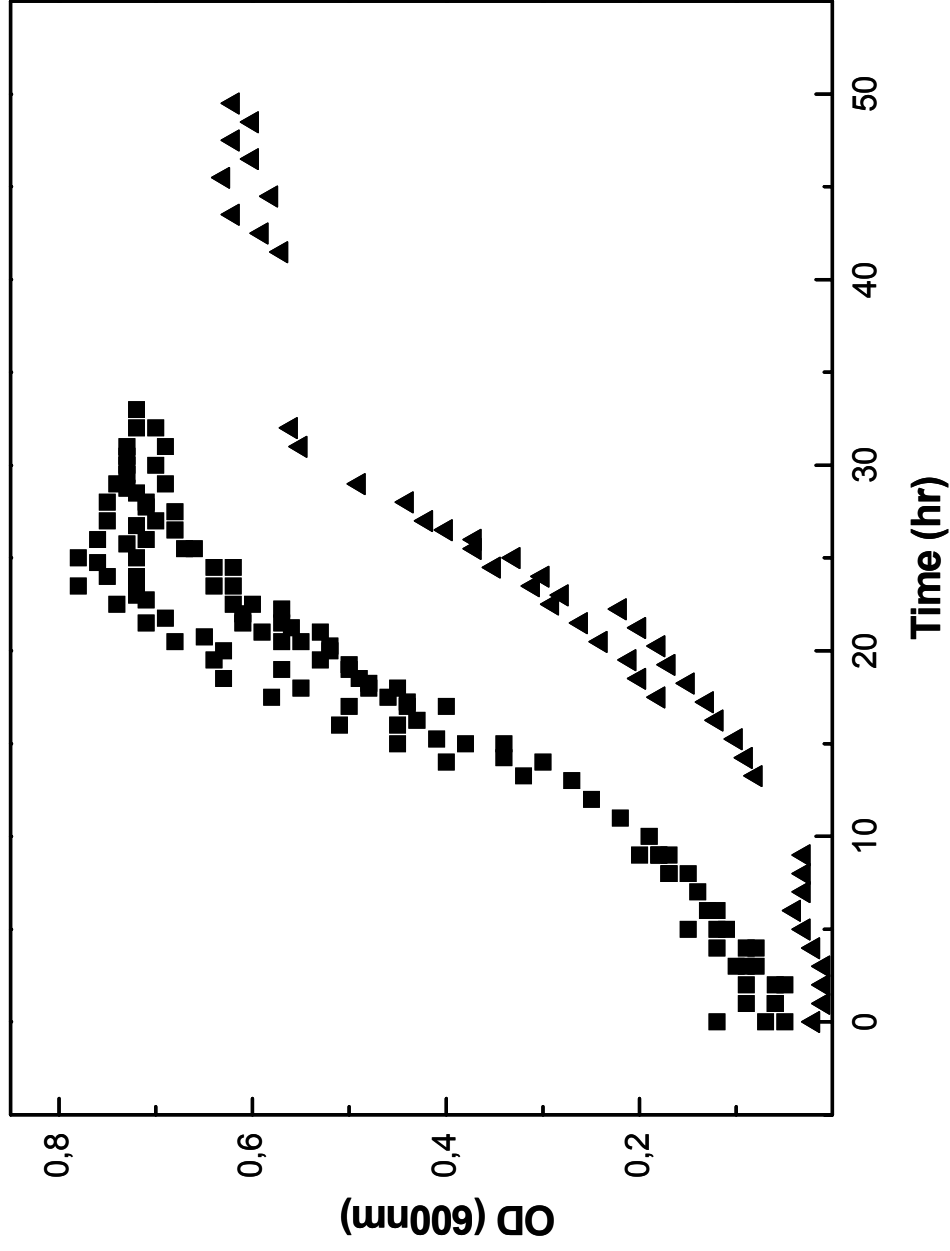

**Figure S2:** Inactivation of DVU2106 affects the growth phenotype.  
Square: DVH Wild-type and triangles: DVH p2106::2106PAS strain

**Fievet et al., Figure S2**
